# Supplementary material for: MicroRNA‐574 regulates FAM210A expression and influences pathological cardiac remodeling
Source: PubMed Central journal article supplement (PMC7863409; doi:10.15252/emmm.202012710), 2020-12-28
Supplement: EMMM-13-e12710-s002.pdf [file EMMM-13-e12710-s002.pdf]

## Expanded View Figures

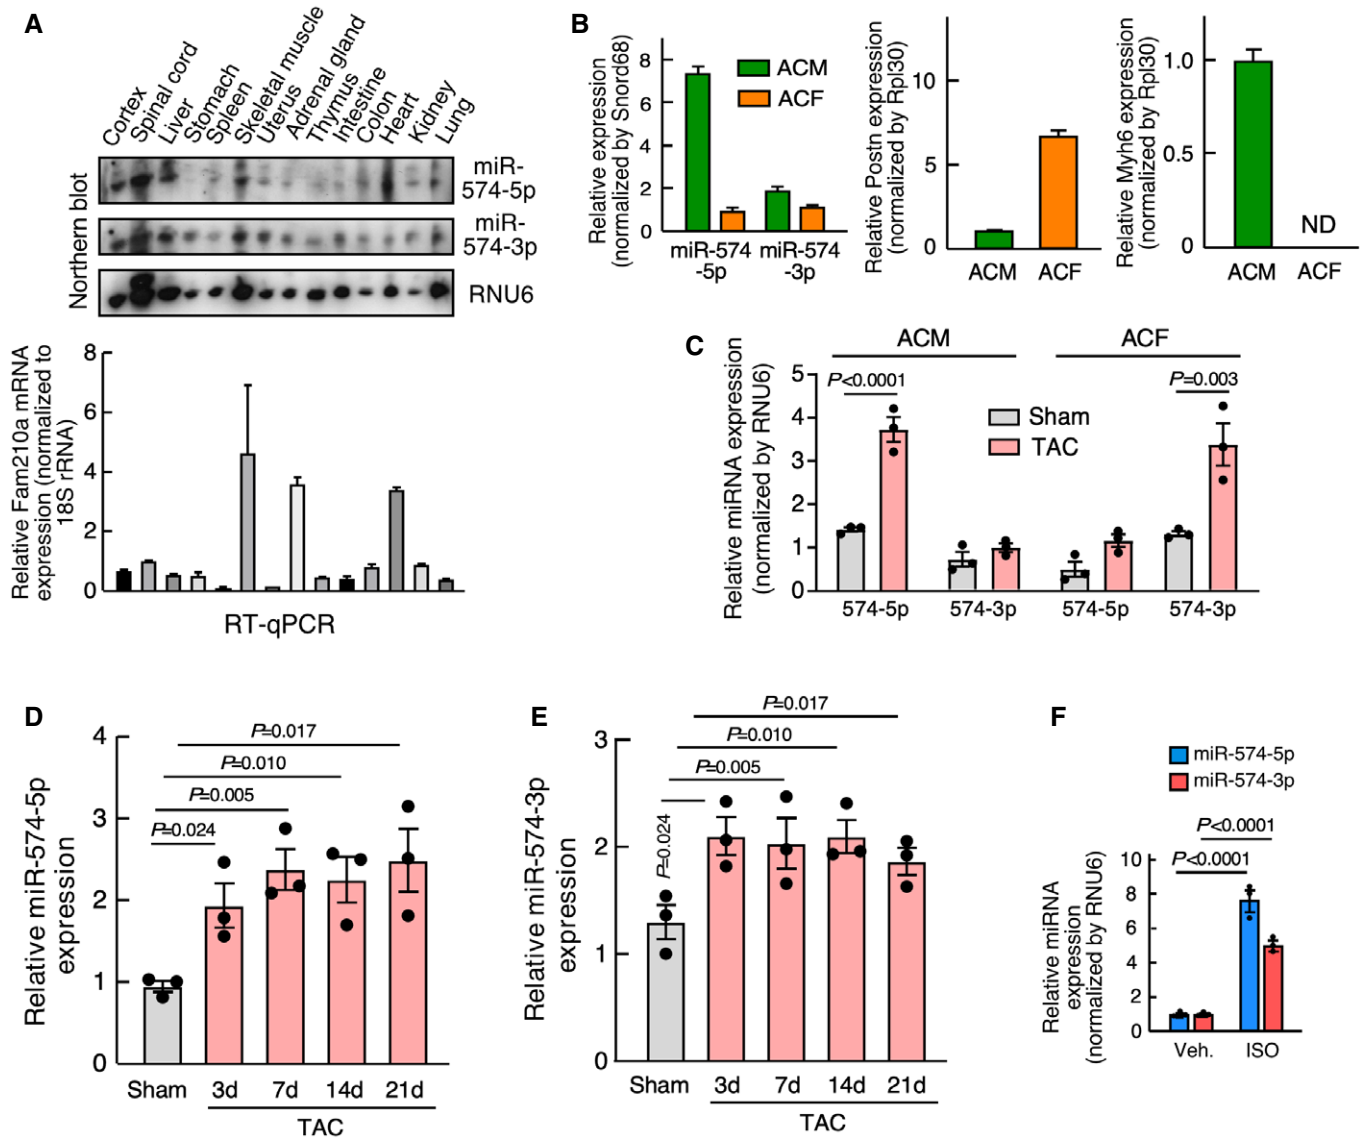

**Figure EV1. Expression of miR-574-5p/3p in murine organs and cardiac cells.**

- A Northern blot detection of miR-574-5p/3p expression and RT-qPCR measurement of *Fam210a* mRNA expression in various murine organs (n = 3).
- B miR-574-5p and miR-574-3p expression in adult CM and CF cells isolated from murine hearts of WT mice at baseline. Postn and Myh6 are used as cardiac fibroblast and cardiomyocyte marker, respectively. N = 3 per group.
- C miR-574-5p and miR-574-3p expression in adult CM and CF cells isolated from murine hearts of WT mice undergoing TAC surgery after 3 days. N = 3 per group.
- D, E Expression of miR-574-5p and miR-574-3p in the heart from mice undergoing TAC surgery at different time points. N = 3 per group.
- F ISO induces miR-574-5p and miR-574-3p expression in isolated murine ACMs. N = 3 per group.

Data information: Data were presented as mean  $\pm$  SEM. P values were calculated by one-way ANOVA with Tukey's multiple comparisons test (C-E) and two-way ANOVA with Tukey's multiple comparisons test (F).

Source data are available online for this figure.

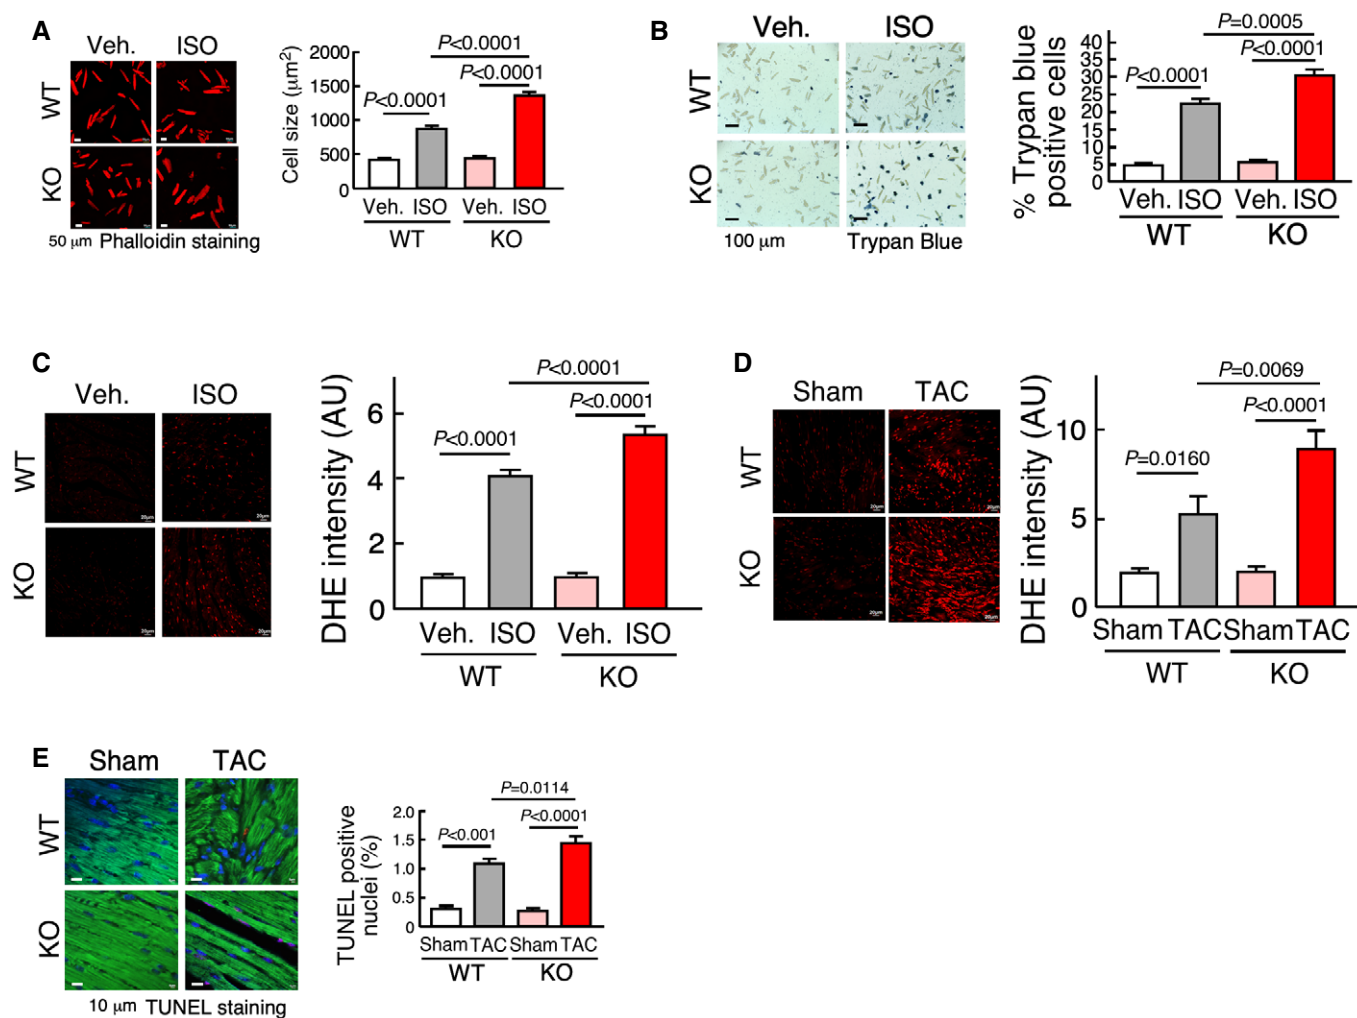

**Figure EV2. Phenotypic characterization of isolated CMs and hearts of WT and miR-574<sup>-/-</sup> mice.**

- A Phalloidin staining of primary ACMs from WT and miR-574<sup>-/-</sup> mice in response to isoproterenol (ISO) treatment (10 μM for 24 h). Data are obtained from 3 individual experiments (n > 100 CM cells/group). Scale bar: 50 μm.
- B Trypan blue staining of primary ACMs from WT and miR-574<sup>-/-</sup> mice under ISO (10 μM for 48 h) versus vehicle treatment. N = 5 per group. Scale bar: 100 μm.
- C, D DHE staining of frozen sections of hearts from WT and miR-574<sup>-/-</sup> mice under Veh. and ISO treatment or Sham and TAC operation (4 weeks post-surgery). N = 5 per group for (C) and n = 8 per group for (D). Scale bar: 20 μm.
- E TUNEL assay for heart tissue sections from WT and miR-574<sup>-/-</sup> mice under Sham versus TAC surgery. N = 5 per group. Scale bar: 5 μm.

Data information: Data were presented as mean ± SEM. P values were calculated by Kruskal–Wallis test with Dunn’s multiple comparisons test (C) or two-way ANOVA with Tukey’s multiple comparisons test (A, B, D, E).

Source data are available online for this figure.

**Figure EV3. Phenotypic characterization of the therapeutic model using miR-574-5p/3p mimic injection in mice subject to TAC surgery.**

- A RT-qPCR of miR-574-5p and miR-574-3p after injections of the miRNA mimics for 2 or 4 days.  $N = 4$  per group.
- B Creatine kinase test and alanine transaminase (ALT) assay in kidneys and livers from miRNA mimic injected mice.  $N = 4$  per group. TAC: transverse aortic constriction; Sham is control mock surgery for TAC surgery (no constriction).
- C RT-qPCR of hypertrophy and fibrosis marker genes in the hearts of therapeutic mouse models.  $N = 5$  per group.
- D DHE staining of frozen sections of hearts from WT mice under treatment with miRNA mimics in TAC-induced HF mouse models. Sham operation was used as a control for TAC.  $N = 4$  per group. Scale bar: 20  $\mu\text{m}$ .
- E ATP level in heart lysates from WT mice under treatment with miRNA mimics in TAC-induced HF mouse models (6 weeks post-surgery).  $N = 4$  per group.
- F TUNEL assay of murine hearts in the therapeutic models.  $N = 4$  per group. Scale bar: 5  $\mu\text{m}$ . Green color:  $\alpha$ -actinin immunostaining signal. Red color: TUNEL signal. Blue color: DAPI signal.
- G miR-574-5p and miR-574-3p decreased ISO-activated mouse CM hypertrophy. Isolated mouse primary neonatal CMs were stained by FITC phalloidin. The cells were transfected with negative control miRNA, miR-574-3p, and miR-574-5p mimics, followed by ISO (10  $\mu\text{M}$ ) treatment for 24 h.  $N > 100$  cells/group. Scale bar: 10  $\mu\text{m}$ . The dashed line in the violin plot shows medium value for the group and the dotted lines represent two quartile lines in each group.
- H Mouse primary CF cell proliferation measured by the CyQUANT cell proliferation kit.  $N = 4$  per group. NS: not significant (compared to Ctrl-miR group).
- I Western blot measurement of  $\alpha$ -SMA in TGF- $\beta$  (10 ng/ml; 24 h) treated mouse primary CF cells. The protein expression was quantified from 4 biological replicates in the right panel. \* $P < 0.05$ ; \*\* $P < 0.01$ ; \*\*\* $P < 0.001$ .

Data information: Data were presented as mean  $\pm$  SEM. All the analyses in (B-F) were performed 6 weeks post-surgery for *in vivo* experiments.  $P$  values were calculated by one-way ANOVA with Tukey's multiple comparisons test (C-F, H), unpaired two-tailed Student  $t$  test (G), and two-way ANOVA with Tukey's multiple comparisons test (I). Source data are available online for this figure.

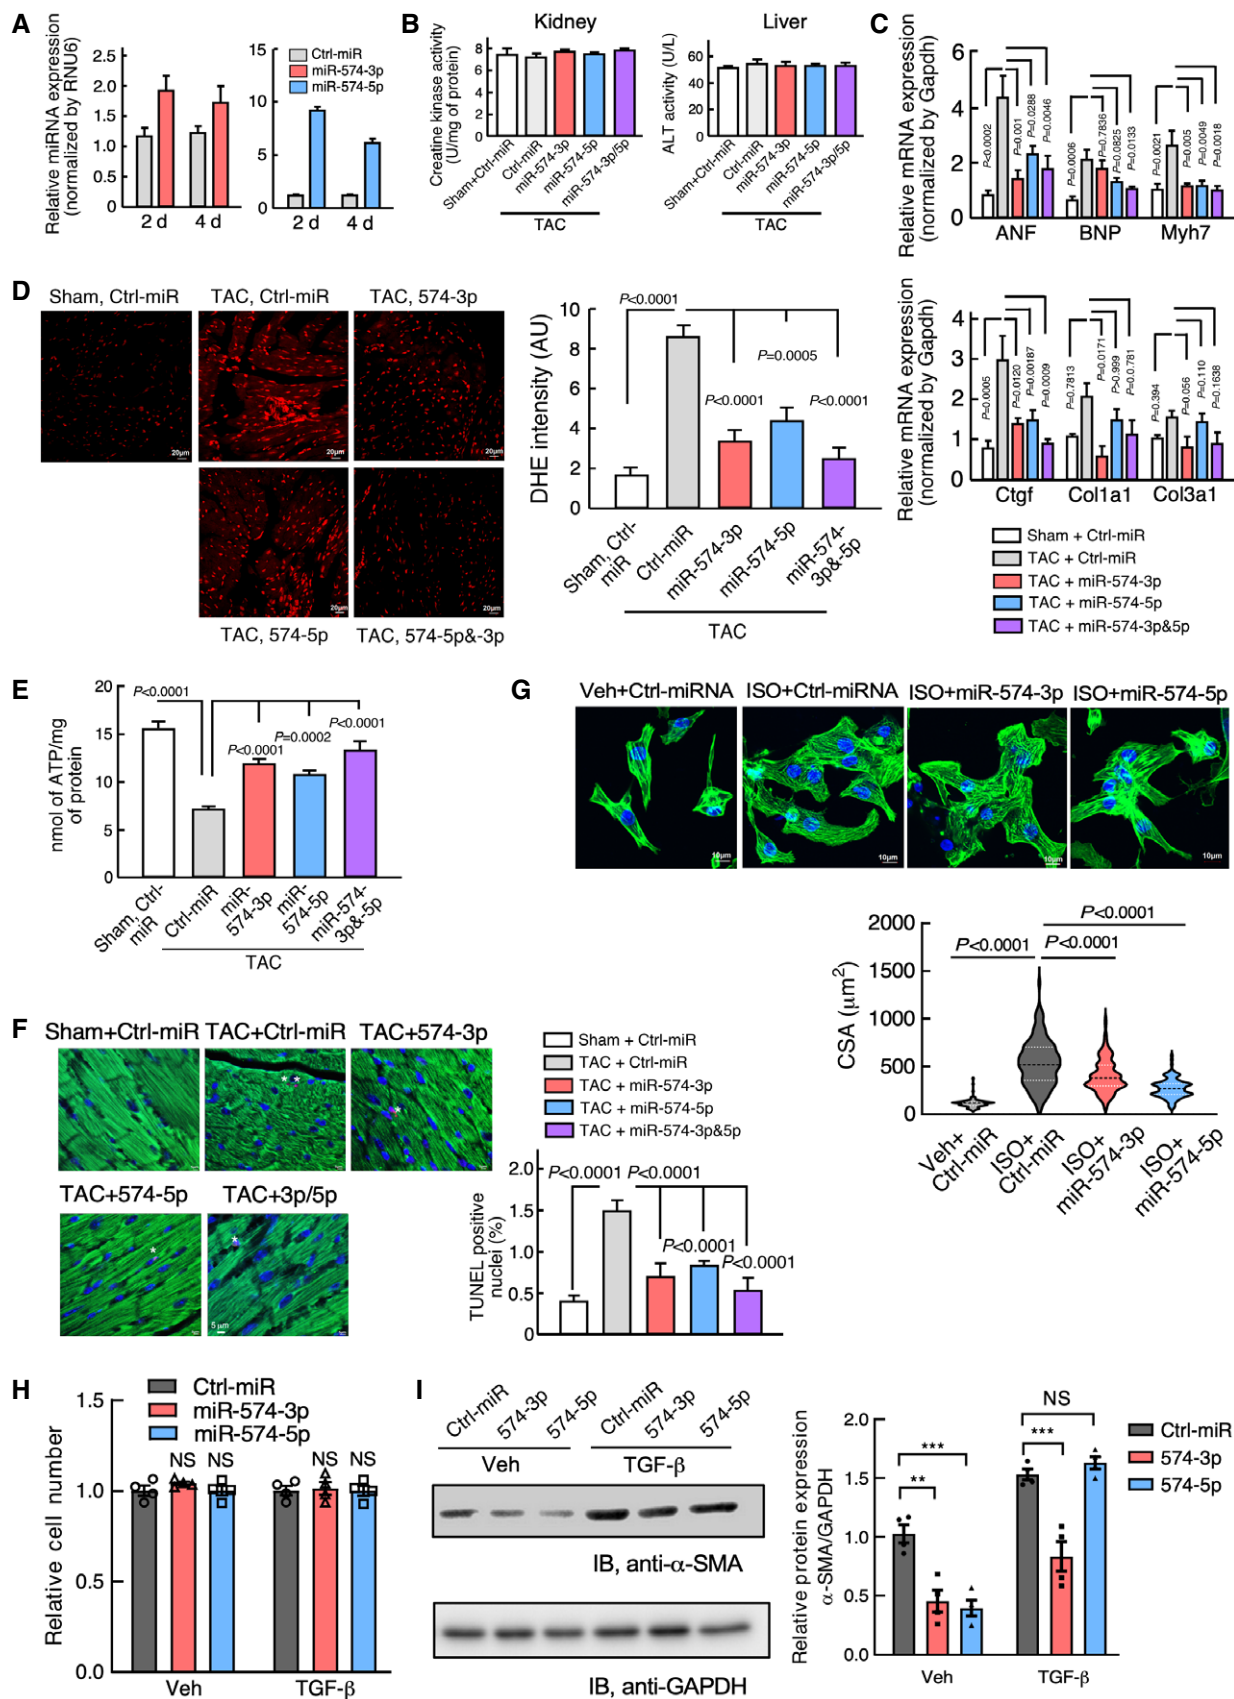

Figure EV3.

**Figure EV4. miR-574-FAM210A axis modulates mitochondrial protein expression and mitochondrial activity in AC16 cardiomyocyte cells.**

- A, B Quantitative analysis of Western blot data from Fig 8C and D. n.d., not detected. Each experiment was done in triplicates.
- C ISO (isoproterenol)-induced cardiomyocyte hypertrophy indicated by phalloidin staining in human AC16 CM cells treated with miRNA mimics (100 nM for 24 h).  $N > 110$  cells/group. Scale bar: 10  $\mu\text{m}$ . The black line in the violin plot shows medium value for the group and the dotted lines represent two quartile lines in each group.
- D ISO-induced CM hypertrophy in AC16 cells treated with anti-miR inhibitors (10  $\mu\text{M}$  ISO and 100 nM anti-miR inhibitor treatment for 24 h).  $N = 110$ –150 cells/group. Scale bar: 10  $\mu\text{m}$ .
- E Representative TMRE staining images of AC16 CM cells. Scale bar: 10  $\mu\text{m}$ .
- F, G Transmission electron microscopy analysis of mitochondrial surface area and cristae number. 60–150 mitochondria were quantified from 3 hearts. Scale bar: 1  $\mu\text{m}$  and 0.5  $\mu\text{m}$ .  $**P < 0.01$ .
- H Quantitative analysis of Western blot data from Fig 8I. Each experiment was done in triplicates. Control AC16 cells and cells with FAM210A stable overexpression were treated with 10  $\mu\text{M}$  ISO for 24 h, followed by transfection of 100 nM of miRNA mimics.  $*P < 0.05$ ;  $**P < 0.01$ ;  $***P < 0.001$ .
- I Measurement of mitochondrial copy number in AC16 cells transfected with Ctrl-miR, miR-574-5p, miR-574-3p in the presence or absence of FAM210A overexpression.  $N = 3$  per group.

Data information: Data were presented as mean  $\pm$  SEM.  $P$  values were calculated by one-way ANOVA (A, B), Kruskal–Wallis test with Dunn's multiple comparisons test (C, D), one-way ANOVA with Tukey's multiple comparisons test (F, G), or two-way ANOVA with Tukey's multiple comparisons test (H). Source data are available online for this figure.

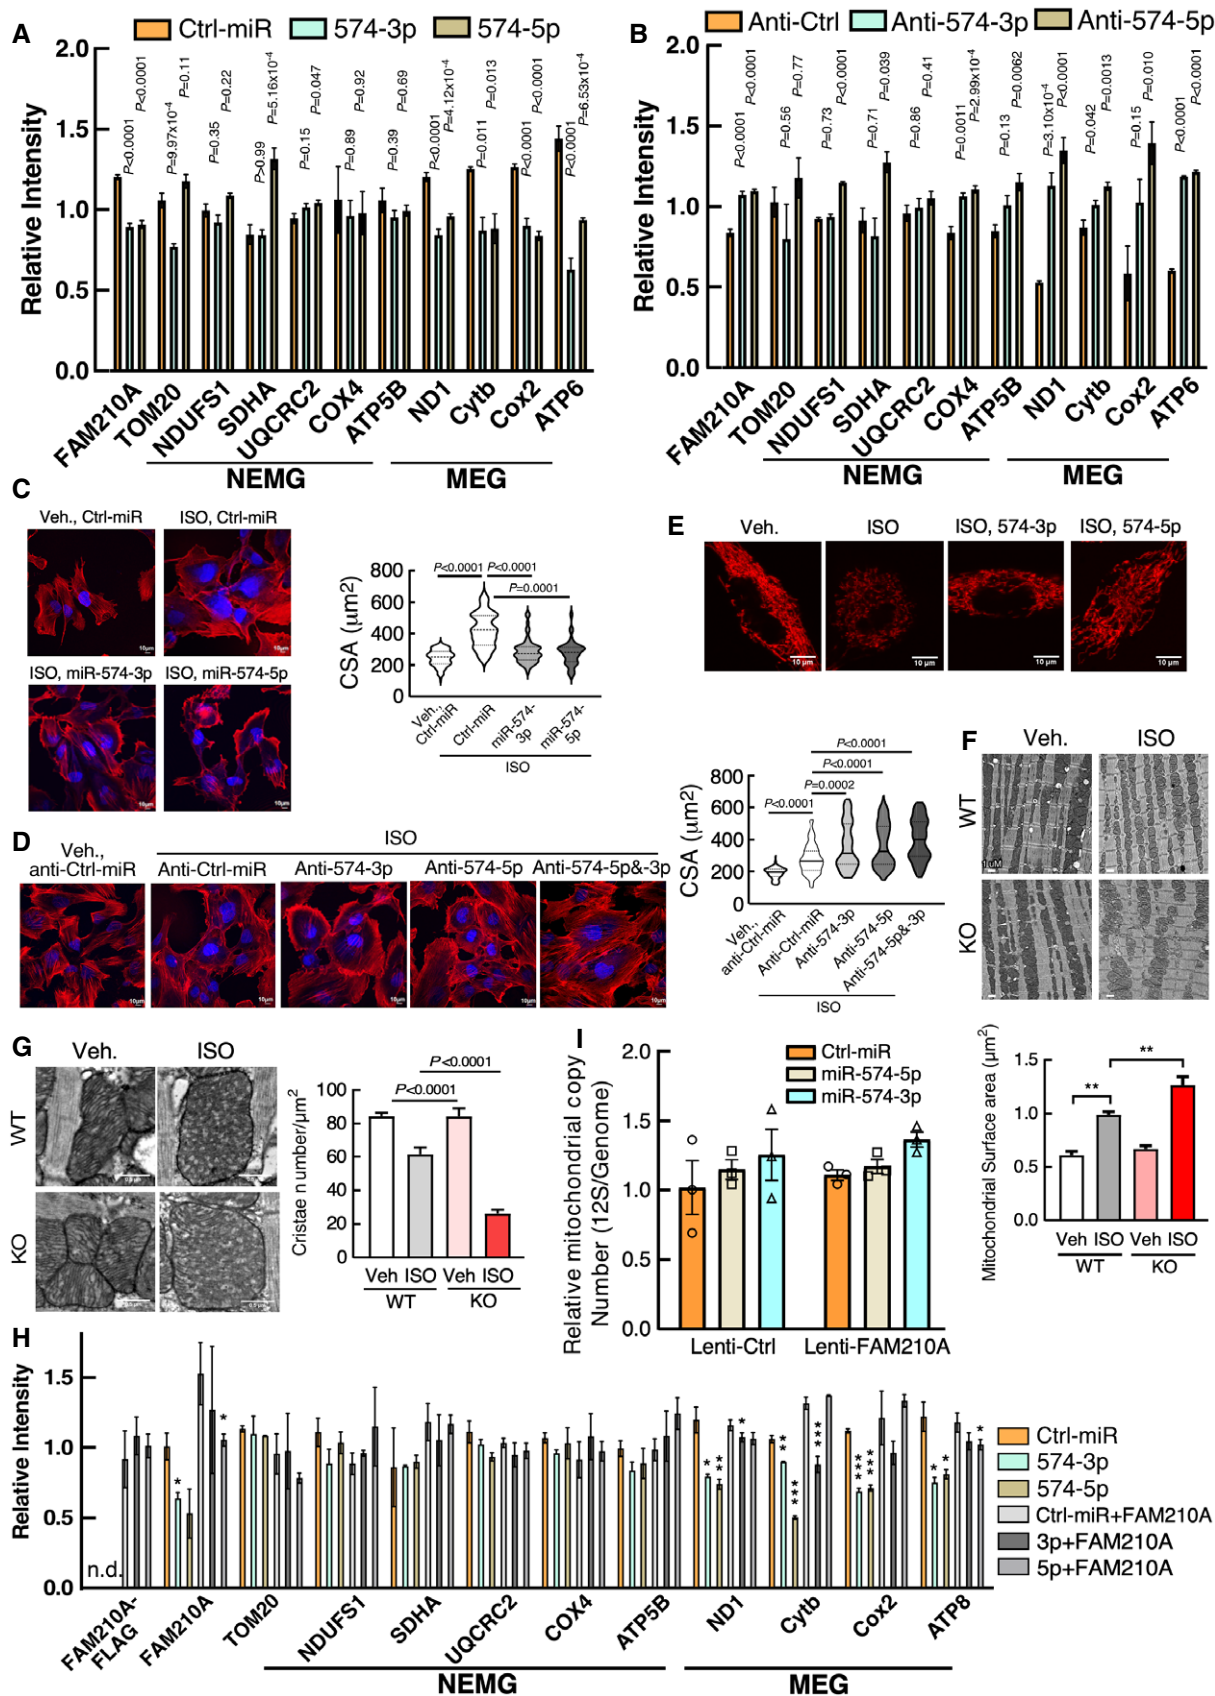

Figure EV4.

**Figure EV5. miR-574-FAM210A axis modulates mitochondrial protein expression and mitochondrial activity in murine hearts.**

- A, B IF analysis of protein expression of ETC complex protein components in WT and miR-574 KO hearts 3 days after TAC surgery.  $n = 5$  hearts per group with > 100 CMs measured per group. Scale bar: 10  $\mu\text{m}$ . The dashed line in the violin plot shows medium value for the group and the dotted lines represent two quartile lines in each group.
- C Measurement of mitochondrial copy number in WT and miR-574 KO hearts 3 days after TAC surgery ( $n = 4$ ).
- D Measurement of mitochondrial electron transport chain complex enzymatic activities in heart lysates of WT and miR-574 KO mice at 4 weeks after TAC or Sham surgery ( $n = 5$  per group).

Data information: Data were presented as mean  $\pm$  SEM.  $P$  values were calculated by two-way ANOVA with Tukey's multiple comparisons test (B-D). Source data are available online for this figure.

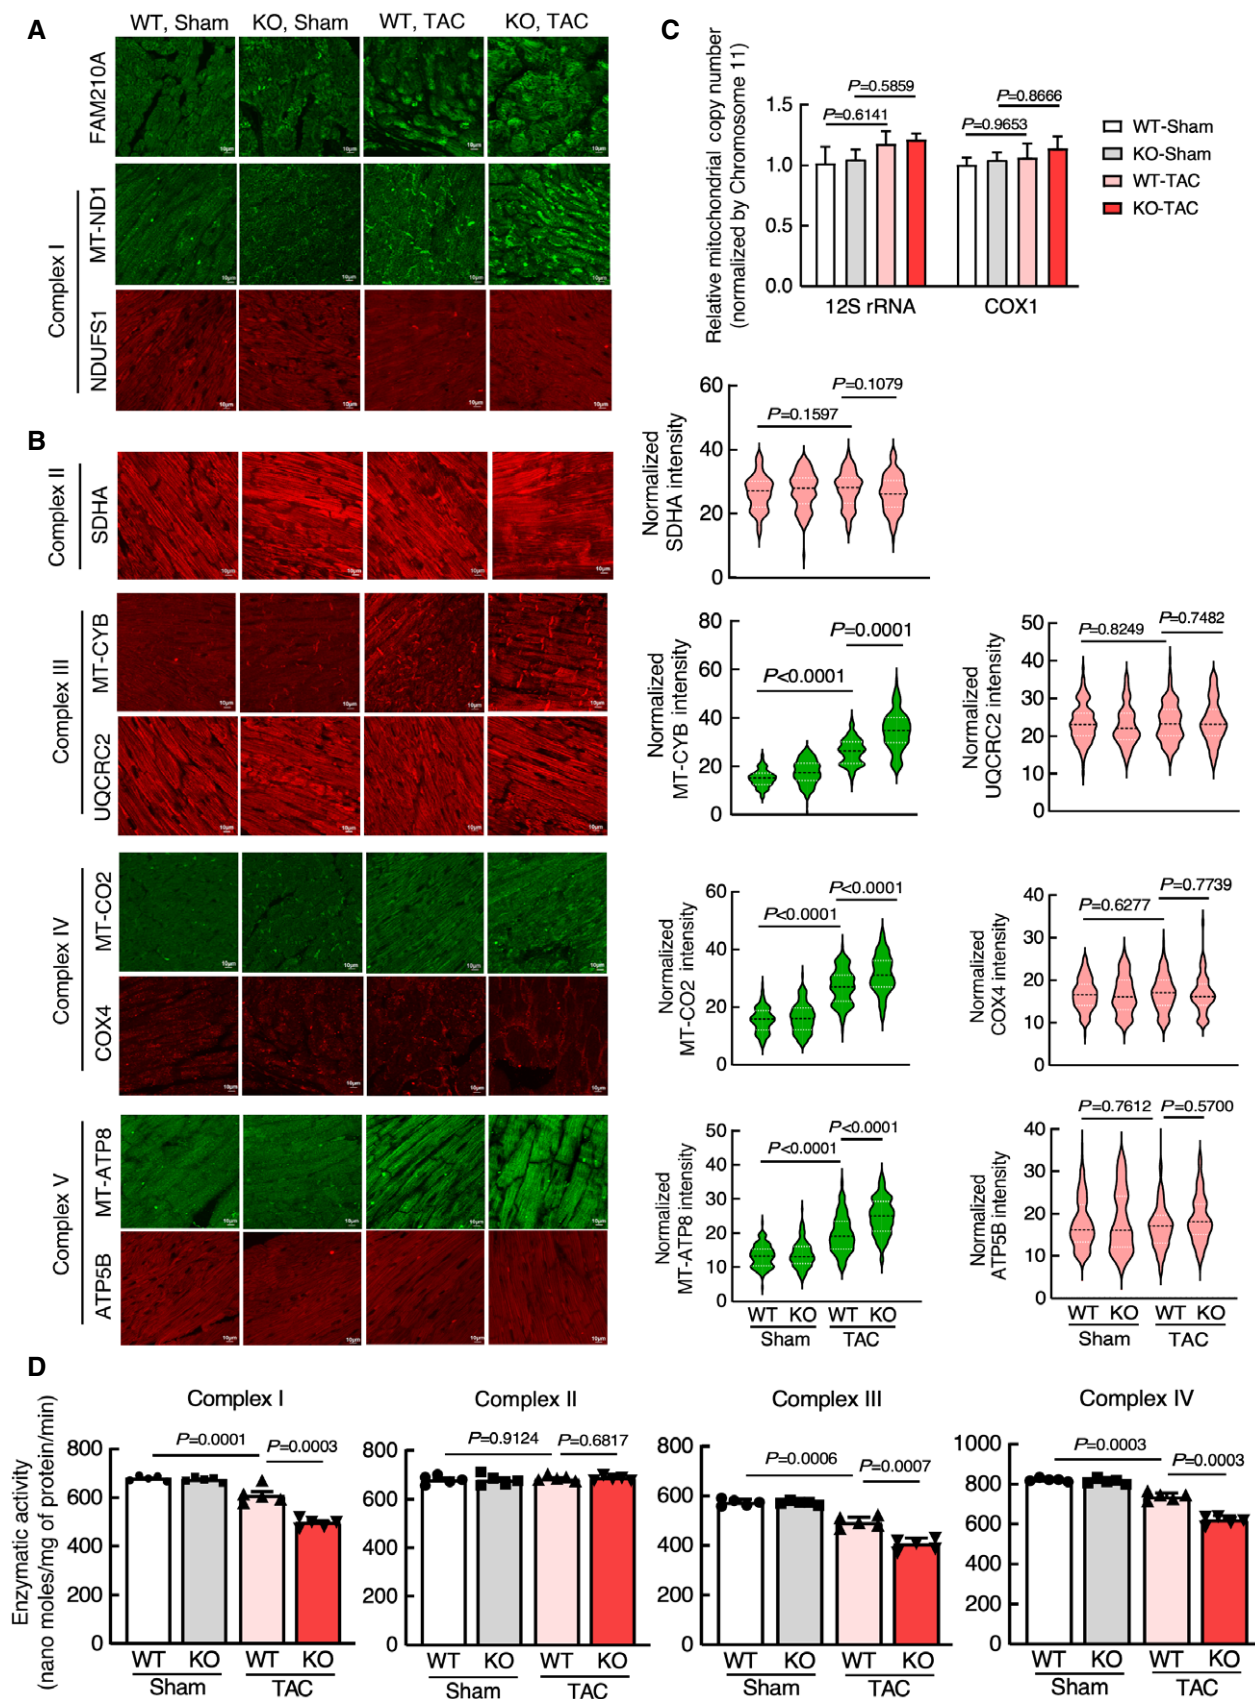

Figure EV5.
